# Supplementary material
Source: publisher figshare collection journal article supplement (https://acs.figshare.com/ndownloader/files/5128555)
Supplement: Supplementary file 1 [file 5128555]

## SUPPORTING INFORMATION

### Supporting Electrolyte and Solvent Effects On Single Electron Double Layer Capacitance Charging of Hexanethiolate-Coated Au<sub>140</sub> Nanoparticles

Rui Guo, Dimitra Georganopoulou, Stephen W. Feldberg<sup>#</sup>, Robert Donkers, Royce W.  
Murray\*

*Kenan Laboratories of Chemistry, Univ. of North Carolina, Chapel Hill, NC 27599-3290*

#### **e/ΔV is a differential not an integral capacitance.**

A key premise of this paper is that over the region of interest, essentially the potential spacings between the peaks of interest, we can write:

$$\frac{\Delta V}{\Delta q} \cong \frac{1}{C_d} \quad \text{S-1}$$

where  $C_d$  is the differential capacitance,  $\Delta V$  is a finite change in potential and  $\Delta q$  is a finite change in charge. For the charging of a mono-disperse collection of MPCs, Chen et al (Ref. 8a) showed that the standard potential,  $E_{z+1/z}^0$ , obtains when the number of MPCs with charge  $n_{z+1}$  equals the number with charge  $n_z$ ; similarly, the standard potential,  $E_{z/z-1}^0$ , obtains when the number of MPCs with charge  $n_z$  equals the number with charge  $n_{z-1}$ .

The difference in these two standard potentials,  $E_{z+1/z, c_{SE}}^0 - E_{z/z-1, c_{SE}}^0$  defines the change in potential required to convert the system from the condition where  $n_{z+1} = n_z$  to the condition where  $n_z = n_{z-1}$  - a transition that requires the transfer of a single unit of charge per MPC if we assume that virtually all of the charge resides essentially in two forms at the standard potential. Thus Equation S-1 can be expressed as:

$$E_{z+1/z, c_{SE}}^0 - E_{z/z-1, c_{SE}}^0 \cong \frac{e}{C_{\text{MPC}, z}} \quad \text{S-2}$$

where  $C_{\text{MPC}, z}$  is differential capacitance approximately at the point where the MPC has  $z$  charges. This equation is valid for a given value of the concentration of supporting

electrolyte,  $c_{\text{SE}}$ . We can express  $C_{\text{MPC},z}$  in terms of its compact and diffuse differential capacitive components:

$$\frac{1}{C_{\text{MPC},z}} = \frac{1}{C_{\text{COMPACT},z}} + \frac{1}{C_{\text{DIFFUSE},z,c_{\text{SE}}}} \quad \text{S-3}$$

Combining Equations S-1 and S-2 gives

$$E_{z+1/z,c_{\text{SE}}}^0 - E_{z/z-1,c_{\text{SE}}}^0 \cong \frac{e}{C_{\text{MPC},z}} = e \left( \frac{1}{C_{\text{COMPACT},z}} + \frac{1}{C_{\text{DIFFUSE},z,c_{\text{SE}}}} \right) \quad \text{S-4}$$

We assume that only  $C_{\text{DIFFUSE},z,c_{\text{SE}}}$  is a function of  $c_{\text{SE}}$ . The value of  $E_{z+1/z,c_{\text{SE}}}^0 - E_{z/z-1,c_{\text{SE}}}^0$  is experimentally determined and the values of  $C_{\text{DIFFUSE},z,c_{\text{SE}}}$  can be theoretically computed using the spherical diffuse layer simulation. A plot of  $E_{z+1/z,c_{\text{SE}}}^0 - E_{z/z-1,c_{\text{SE}}}^0$  vs  $e/C_{\text{DIFFUSE},z,c_{\text{SE}}}$  for a given  $z$  and different values of  $c_{\text{SE}}$  should have a slope of unity and an intercept of  $e/C_{\text{COMPACT},z}$ . A slope of unity along with a sensible intercept (likely different for different values of  $z$ ) confirms the validity of the analysis, as is shown in Figure 4. The analogous plot of Gouy Chapman  $C_{\text{DIFFUSE}}$  calculations according to Equation 1, shown as Figure S-5, shows that the flat-surface model is a poor approximation for nanoparticles.

## Figure Legends

Figure S-1. Cyclic voltammogram (CV) of 0.08 mM  $\text{Au}_{140}(\text{SC6})_{53}$  in  $\text{CH}_2\text{Cl}_2$  with 0.1 M  $\text{Bu}_4\text{NClO}_4$  at 283 K.

Figure S-2. Capacitance versus MPC core charge state plot of 0.08 mM  $\text{Au}_{140}(\text{SC6})_{53}$  in  $\text{CH}_2\text{Cl}_2$  with different  $\text{Bu}_4\text{NClO}_4$  concentrations at 283 K. At core charge states +2, +1, 0, -1, -2, -3. In taking the capacitances from OSWV data, peak potentials taken in forward and reverse potential scans are averaged in order to cancel the residual  $\text{IR}_{\text{UNC}}$  distortion of the peak position, which is important at low  $\text{Bu}_4\text{NClO}_4$  concentrations.

Figure S-3. Osteryoung square wave voltammogram (OSWV) of 0.05 mM  $\text{Au}_{140}(\text{SC6})_{53}$  in THF with  $\text{Bu}_4\text{NClO}_4$  (0.1 M) as the supporting electrolyte at 283 K.

Figure S-4.  $U_{\text{dl}}$  versus  $\log_{10}(\kappa r_0)$  plot based on numerical simulation of spherical diffuse layer.  $U_{\text{dl}} = Z_{\text{SE}} e \phi_2 / k_{\text{B}} T$ ,  $\kappa = (2n_{\text{SE}} Z_{\text{SE}}^2 e^2 / \epsilon \epsilon_0 k_{\text{B}} T)^{1/2}$ ,  $Z_{\text{norm}} = Z_{\text{SE}} Z_{\text{MPC}} e^2 / (4\pi r_0 \epsilon \epsilon_0 k_{\text{B}} T)$ ,  $r_0$  is the summation of the  $\text{Au}_{140}$  MPC core radius and the hexanethiolate monolayer thickness (i.e.,  $r_{\text{CORE}} + d$ ).  $Z_{\text{SE}}$  is the charge of the supporting electrolyte ions, which is 1 for  $\text{Bu}_4\text{NClO}_4$ ,  $n_{\text{SE}}$  is the number concentration of  $\text{Bu}_4\text{NClO}_4$ ,  $Z_{\text{MPC}}$  is the MPC core charge state, and the rest symbols have their usual meaning.  $U_{\text{dl}}(\text{SIM})$  is the spherical simulation result, while  $U_{\text{dl}}(\text{GC})$  is the result based on Gouy-Chapman theory (planar electrode SAM).  $\log_{10}(\kappa r_0)$  falls in between -0.293 and 0.703 (see vertical lines) when  $\text{Bu}_4\text{NClO}_4$  concentration varies from 1.02 mM to 100.3 mM at 283K. (a)  $Z_{\text{NORM}} = 8.2$ , when  $Z_{\text{MPC}} = 2$ ,  $Z_{\text{SE}} = 1$ ,  $T = 283\text{K}$ . (b)  $Z_{\text{NORM}} = 20.5$ , when  $Z_{\text{MPC}} = 5$ ,  $Z_{\text{SE}} = 1$ ,  $T = 283\text{K}$ . It is obvious that when  $Z_{\text{MPC}}$  becomes larger,  $U_{\text{dl}}(\text{GC})$  is getting closer to  $U_{\text{dl}}(\text{SIM})$  results.

Figure S-5. Plot of Equation 1, according to experimental  $C_{\text{MPC}}$  data and  $C_{\text{DIFFUSE}}$  calculations from Gouy-Chapman theory (Ref. 7a). Slopes are 0.45 (+2 charge state), 1.21 (+1 charge state), 0.40 (0 charge state), and 1.20 (-1 charge state).

Figure S-1.

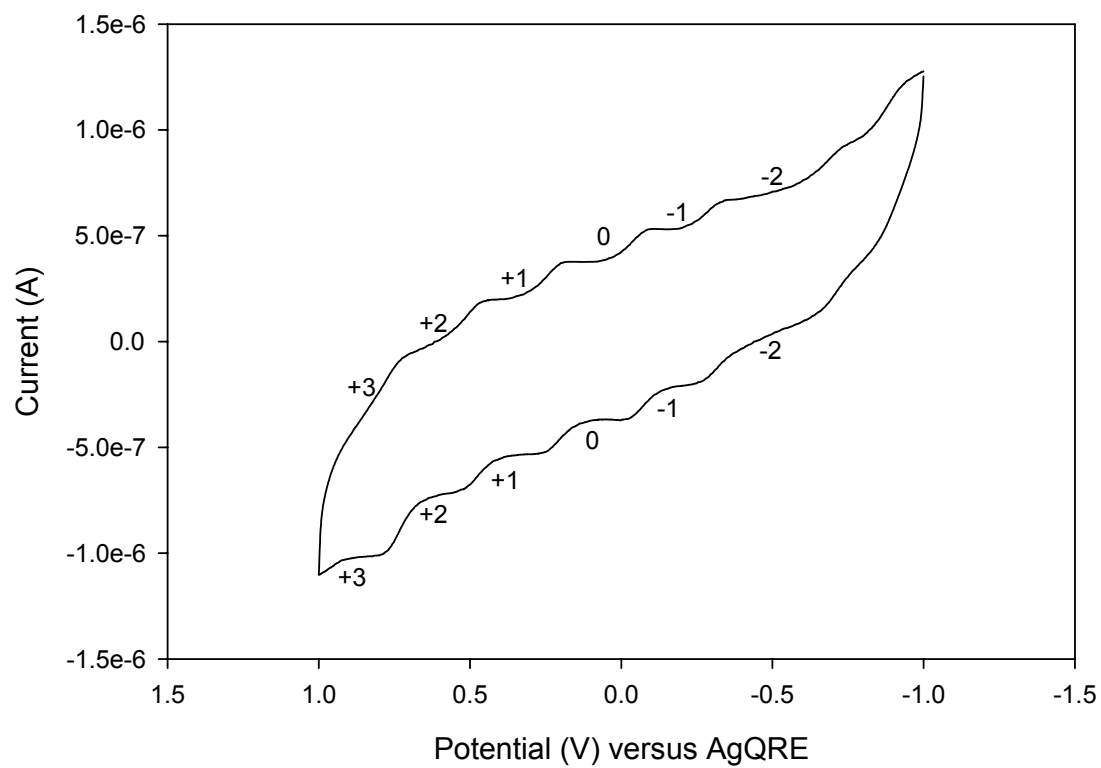

Figure S-2.

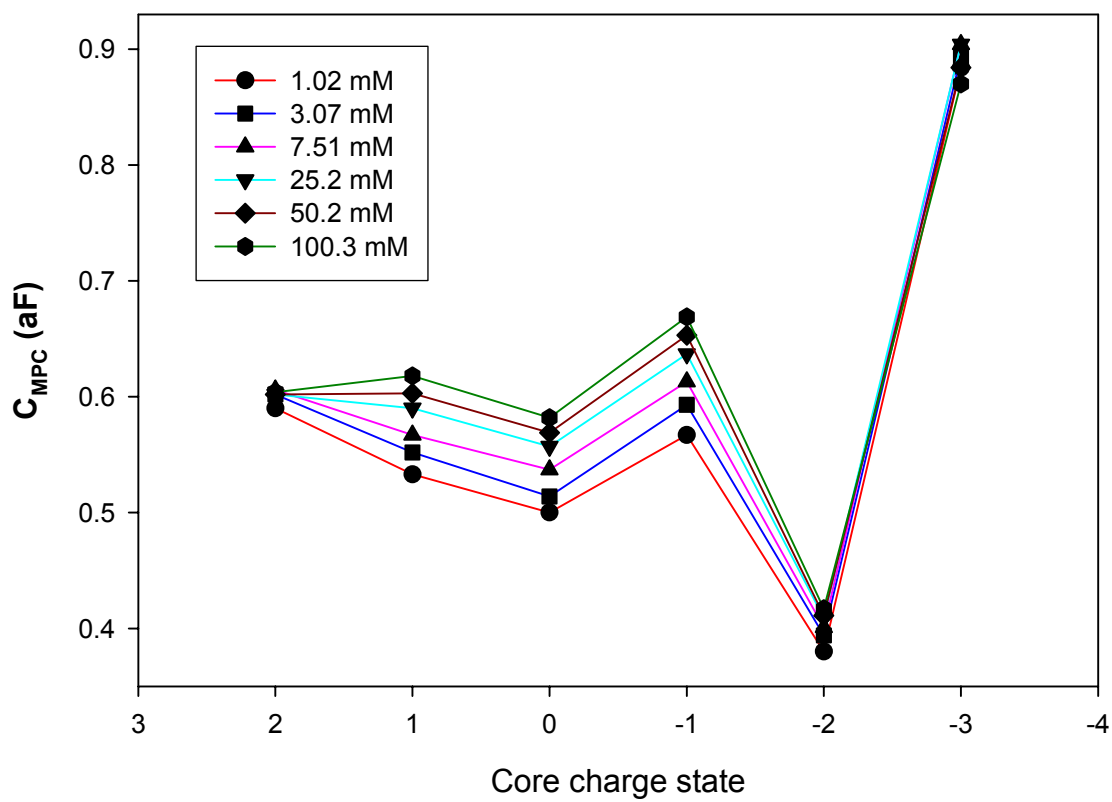

Figure S-3.

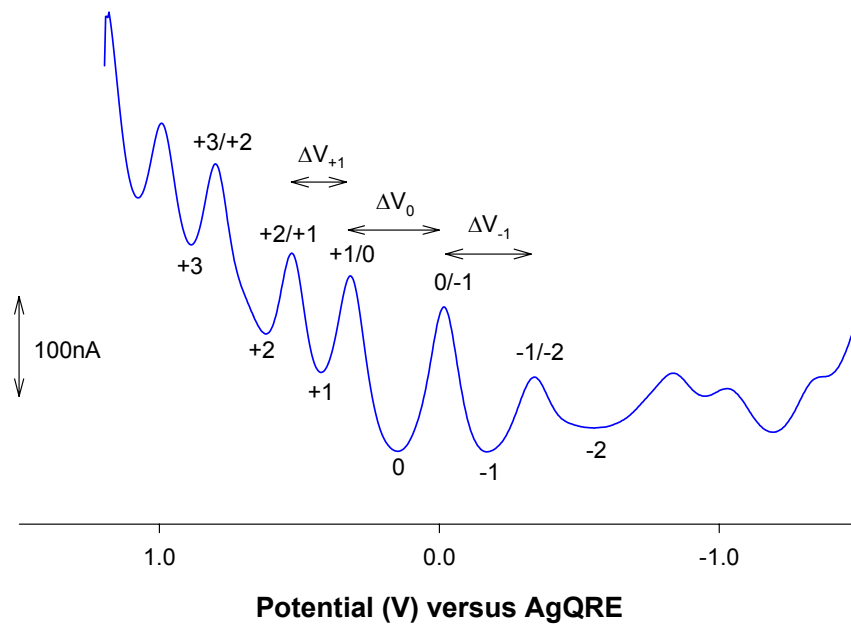

Figure S-4 (a)

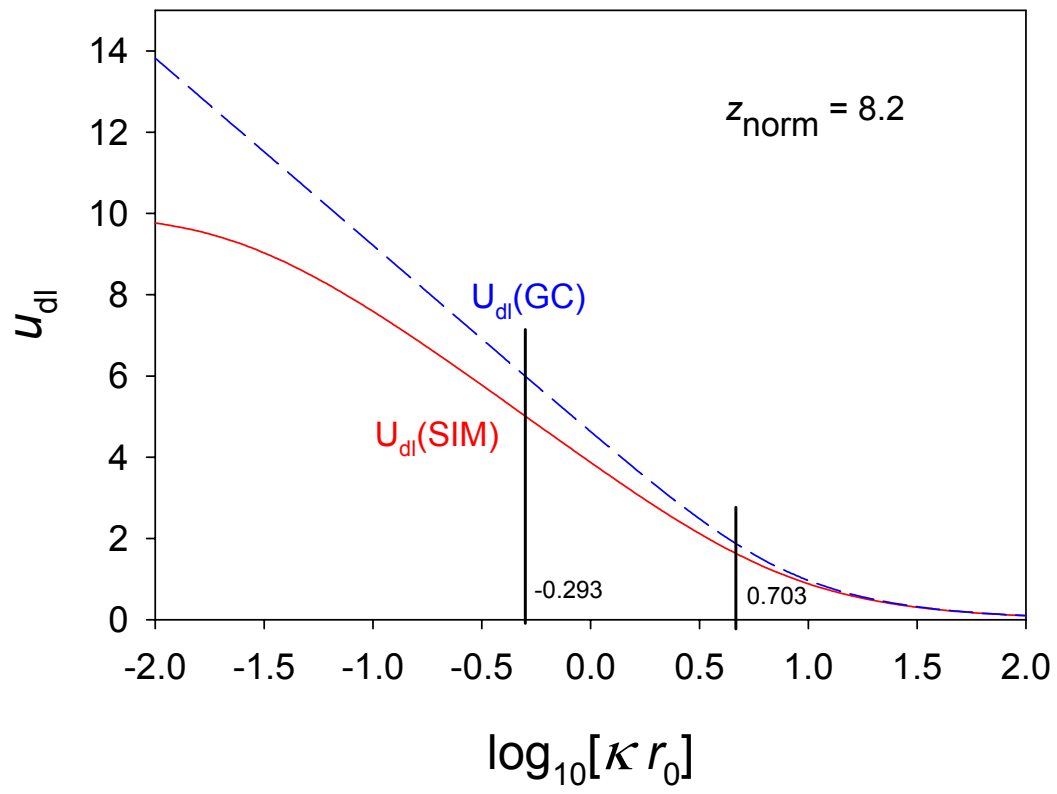

Figure S-4 (b)

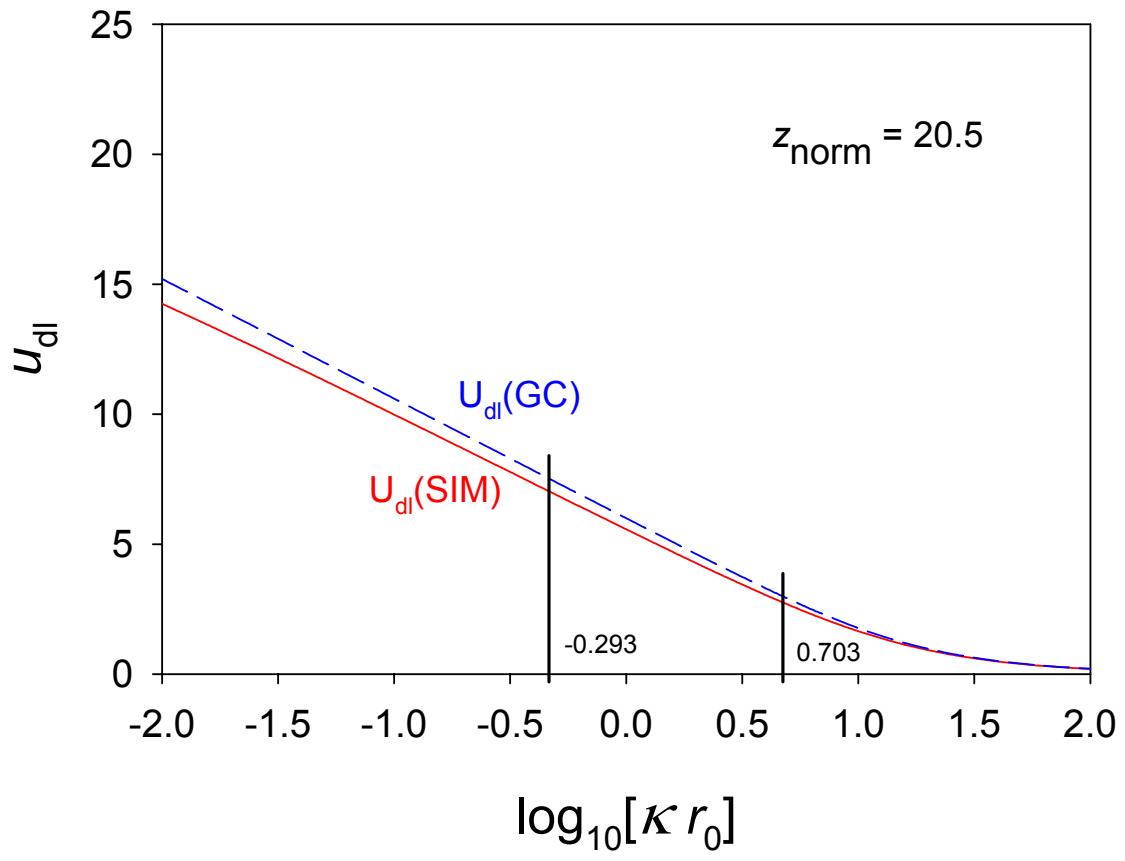



Figure S-5

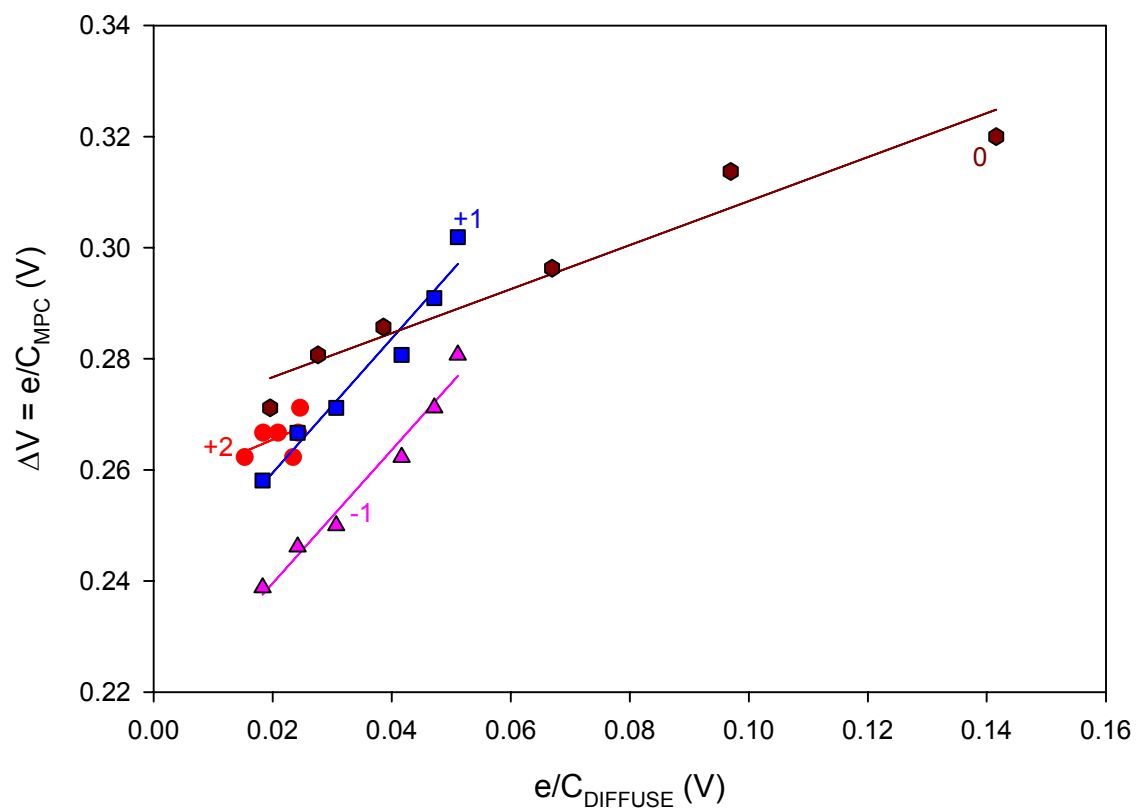

Table S-1. Capacitance of 0.08 mM Au<sub>140</sub>(SC6)<sub>53</sub> at different core charge states in CH<sub>2</sub>Cl<sub>2</sub> with different Bu<sub>4</sub>NClO<sub>4</sub> concentrations at 283 K (calculated from  $e/\Delta V$ , where  $\Delta V$  is the average peak to peak spacing of forward and reverse scans of OSWV in Fig.1). C<sub>MPC-2</sub> and C<sub>MPC-3</sub> are the effective capacitances.

| Bu <sub>4</sub> NClO <sub>4</sub><br>(mM) | C <sub>MPC+2</sub><br>(aF) | C <sub>MPC+1</sub><br>(aF) | C <sub>MPC0</sub><br>(aF) | C <sub>MPC-1</sub><br>(aF) | C <sub>MPC-2</sub><br>(aF) | C <sub>MPC-3</sub><br>(aF) |
|-------------------------------------------|----------------------------|----------------------------|---------------------------|----------------------------|----------------------------|----------------------------|
| 1.02                                      | 0.59                       | 0.53                       | 0.50                      | 0.57                       | 0.38                       | 0.88                       |
| 3.07                                      | 0.60                       | 0.55                       | 0.51                      | 0.59                       | 0.39                       | 0.89                       |
| 7.51                                      | 0.61                       | 0.57                       | 0.54                      | 0.61                       | 0.40                       | 0.90                       |
| 25.2                                      | 0.60                       | 0.59                       | 0.56                      | 0.64                       | 0.41                       | 0.90                       |
| 50.2                                      | 0.60                       | 0.60                       | 0.57                      | 0.65                       | 0.41                       | 0.88                       |
| 100.3                                     | 0.61                       | 0.62                       | 0.59                      | 0.67                       | 0.42                       | 0.87                       |
